# Supplementary material for: Low HDL Cholesterol, Metformin Use, and Cancer Risk in Type 2 Diabetes
Source: Oxford University Press journal article supplement (doi:10.2337/dc10-1509), 2010-10-28
Supplement: dc101509supplementarydata.pdf [file dc101509supplementarydata.pdf]

## ONLINE APPENDIX

**Supplementary Table 1. Univariable hazard ratios of metformin usage for cancer after excluding patients with different durations of drug usage prior to enrolment**

| Number of years of metformin usage before enrolment | Remaining sample size† | Hazard ratio | 95% CI       | P value |
|-----------------------------------------------------|------------------------|--------------|--------------|---------|
| No exclusion                                        | 6103                   | 0.54         | 0.42 to 0.69 | <.0001  |
| 0 (exclusion of users at enrolment)                 | 3086                   | 0.38         | 0.27 to 0.54 | <.0001  |
| 0.5                                                 | 2776                   | 0.38         | 0.26 to 0.55 | <.0001  |
| 1.0                                                 | 2727                   | 0.37         | 0.26 to 0.54 | <.0001  |
| 1.5                                                 | 2695                   | 0.37         | 0.26 to 0.54 | <.0001  |
| 2.0                                                 | 2675                   | 0.37         | 0.26 to 0.54 | <.0001  |
| 2.5                                                 | 2658                   | 0.37         | 0.25 to 0.54 | <.0001  |
| 3.0                                                 | 2645                   | 0.37         | 0.25 to 0.54 | <.0001  |
| 4.0                                                 | 2630                   | 0.37         | 0.25 to 0.54 | <.0001  |
| 5.0                                                 | 2622                   | 0.37         | 0.25 to 0.54 | <.0001  |
| 6.0                                                 | 2618                   | 0.37         | 0.25 to 0.54 | <.0001  |

Abbreviations: 95%CI, 95% confidence interval;

†, Number of remaining patients after excluding those who used methformin during the period before enrolment.

**Supplementary Table 2.. Sensitivity analysis of hazard ratios of combinations of low HDL-C and metformin use for cancer risk in Type 2 diabetes**

| <b>Biological Interaction models</b>                          | <b>Hazard ratio</b> | <b>95% CI</b> | <b>P value</b> |
|---------------------------------------------------------------|---------------------|---------------|----------------|
| <b>Sensitivity analysis one †,‡</b>                           |                     |               |                |
| HDL-C <1.0 mmol/L plus nonuse of metformin                    | 4.40                | 1.69 to 11.40 | .0023          |
| HDL-C ≥1.0 mmol/L plus nonuse of metformin                    | 1.82                | 0.98 to 3.38  | .0602          |
| HDL-C < 1.0 mmol/L plus use of metformin                      | 1.76                | 0.63 to 4.93  | .2824          |
| HDL-C ≥1.0 mmol/L plus use of metformin                       |                     | Reference     |                |
| <b>Sensitivity analysis two †,‡</b>                           |                     |               |                |
| HDL-C <1.0 mmol/L plus nonuse of metformin                    | 7.20                | 2.73 to 18.98 | <.0001         |
| HDL-C ≥1.0 mmol/L plus nonuse of metformin                    | 2.00                | 0.97 to 4.13  | .0608          |
| HDL-C < 1.0 mmol/L plus use of metformin                      | 3.35                | 1.05 to 10.74 | .0415          |
| HDL-C ≥1.0 mmol/L plus use of metformin                       |                     | Reference     |                |
| <b>Sensitivity analysis three †,‡</b>                         |                     |               |                |
| HDL-C <1.0 mmol/L plus nonuse of metformin                    | 2.91                | 1.82 to 4.67  | <.0001         |
| HDL-C ≥1.0 mmol/L plus nonuse of metformin                    | 1.53                | 1.53 to 2.07  | .0062          |
| HDL-C < 1.0 mmol/L plus use of metformin                      | 1.03                | 0.67 to 1.57  | .9010          |
| HDL-C ≥1.0 mmol/L plus use of metformin                       |                     | Reference     |                |
| <b>Sensitivity analysis four (not adjusted for covariate)</b> |                     |               |                |
| HDL-C <1.0 mmol/L plus nonuse of metformin                    | 4.37                | 2.66 to 7.19  | <.0001         |
| HDL-C ≥1.0 mmol/L plus nonuse of metformin                    | 2.19                | 1.45 to 3.31  | .0002          |
| HDL-C < 1.0 mmol/L plus use of metformin                      | 1.32                | 0.71 to 2.45  | .3858          |
| HDL-C ≥1.0 mmol/L plus use of metformin                       |                     | Reference     |                |

Abbreviations: 95%CI, 95% confidence interval; HDL-C, high-density lipoprotein cholesterol, LDL-C, low-density lipoprotein cholesterol; SBP, systolic blood pressure; ACEIs, angiotensin-converting enzyme inhibitors; ARBs, angiotensin II receptor blockers;

Sensitivity analysis one was applied to patients who were followed for 2.5 years and more (n=2170); Sensitivity analysis two was applied to patients who were enrolled after 1 July 1998 (n=1707); Sensitivity analysis three was applied to 3445 patients who used metformin during 2.5 years before enrolment and 2658 patients who did not use the drug during that period; Sensitivity analysis four was applied to 2996 patients who did not have missing values in HDL-C.

†, Adjusted for age, sex, employment status, smoking status, alcohol intake, duration of diabetes BMI (BMI ≥27.6 or < 24.0 kg/m<sup>2</sup>), HbA<sub>1c</sub>, SBP, LDL-C related risk indicators (LDL-C ≥3.8 mmol/L and LDL-C<2.8 mmol/L plus albuminuria), HDL-C ≥ 1.30 mmol/L and the non-linear association of triglyceride with cancer at enrolment, and use of statins, fibrates, other lipid lowering drugs, ACEIs/ARBs and insulin during follow-up;

‡, Stratified Cox model analyses on deciles of the propensity score of metformin use were included to control for likelihood of starting metformin therapy during follow-up.

**Supplementary Table 3. Measures for estimation of biological interaction between low HDL cholesterol and nonuse of metformin for the risk of cancer in Type 2 diabetes**

| Measures of biological interaction                            | Estimate | 95% confidence interval | P value |
|---------------------------------------------------------------|----------|-------------------------|---------|
| <b>Sensitivity analysis one †,‡</b>                           |          |                         |         |
| RERI                                                          | 1.82     | -1.88 to 5.52           | .7779   |
| AP                                                            | 0.41     | -0.15 to 0.98           | .4502   |
| S                                                             | 2.16     | 0.52 to 8.98            | .6215   |
| <b>Sensitivity analysis two †,‡</b>                           |          |                         |         |
| RERI                                                          | 2.85     | -3.03 to 8.72           | .3421   |
| AP                                                            | 0.40     | -0.19 to 0.98           | .1864   |
| S                                                             | 1.85     | 0.55 to 6.21            | .4063   |
| <b>Sensitivity analysis three †,‡</b>                         |          |                         |         |
| RERI                                                          | 1.36     | 0.05 to 2.66            | .0414   |
| AP                                                            | 0.47     | 0.19 to 0.75            | .0011   |
| S                                                             | 3.44     | 1.03 to 11.48           | .4021   |
| <b>Sensitivity analysis four (not adjusted for covariate)</b> |          |                         |         |
| RERI                                                          | 1.86     | 0.00 to 3.73            | .0495   |
| AP                                                            | 0.43     | 0.13 to 0.73            | .0053   |
| S                                                             | 2.24     | 0.98 to 5.11            | .1262   |

Notes are the same as those in Supplementary table 2.

**Supplementary Figure 1. Hazard ratios of HDL-C for cancer in Type 2 diabetes using spline Cox model analysis.**

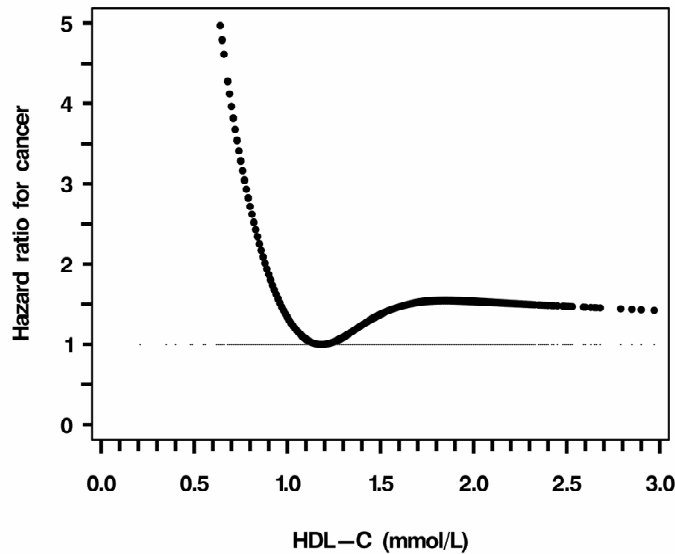

The curve was adjusted for age, sex, employment status, smoking status, drinking status, duration of diabetes, BMI ( $\geq 27.6$  or  $< 24.0$  kg/m<sup>2</sup>), HbA<sub>1c</sub>, SBP, LDL-C related risk indicators (LDL-C  $\geq 3.8$  mmol/L and LDL-C  $< 2.8$  mmol/L plus albuminuria), and the non-linear association of triglyceride with cancer at enrolment and use of statins, fibrates, other lipid lowering drugs, ACEIs/ARBs, metformin and insulin during follow-up.

**Supplementary Figure 2. Cumulative incidence of cancer stratified by a combination of HDL-C <1.0 mmol/L and non-use of metformin during follow-up period**

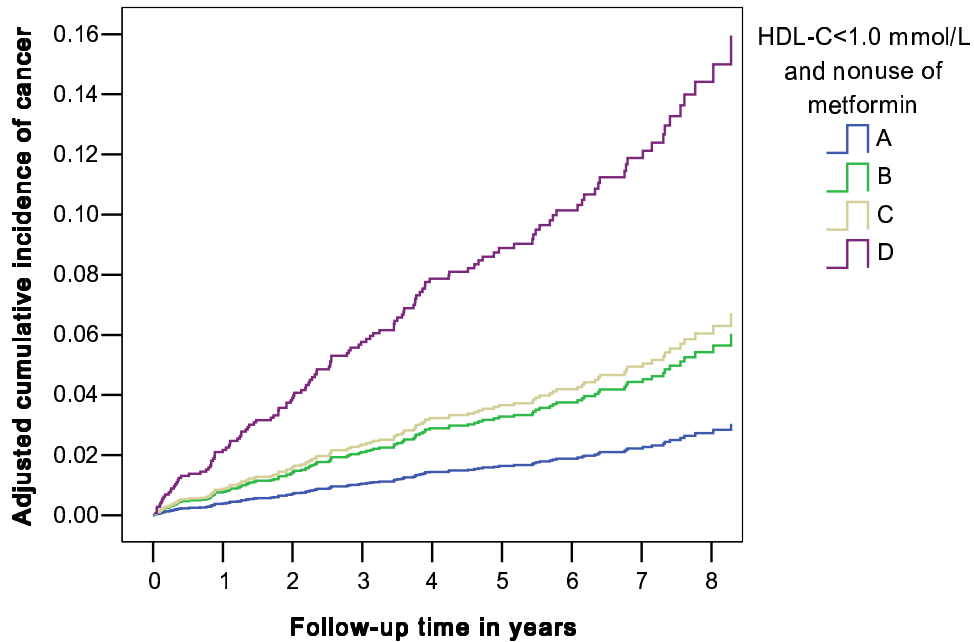

A, HDL-C  $\geq 1.0$  mmol/L plus use of metformin during follow-up period (the last curve from the top). B, HDL-C < 1.0 mmol/L plus use of metformin during follow-up period (the third curve from the top); C, HDL-C  $\geq 1.0$  mmol/L plus non-use of metformin during follow-up period (the second curve from the top); and D, HDL-C < 1.0 mmol/L plus non-use of metformin during follow-up period (the first curve from the top); The model was adjusted for LDL-C related risk indicators (LDL-C  $\geq 3.8$  mmol/L and LDL-C < 2.8 mmol/L plus albuminuria), HDL-C  $\geq 1.30$  mmol/L and the non-linear association of triglyceride with cancer, age, sex, employment status, smoking status, drinking status, duration of diabetes, BMI ( $\geq 27.6$  or  $< 24.0$  kg/m<sup>2</sup>), HbA<sub>1c</sub>, and SBP at enrolment, and use of statins, fibrates, other lipid lowering drugs, ACEIs/ARBs and insulin during follow-up, as well as probability of starting metformin during follow-up (used as a covariate). P was derived from Cox model, P < 0.0001 for D vs. A; P = .0007 for B vs. A; and P = .0708 for C vs. A
